# Supplementary material for: Atomic Force Microscopy Studies Provide Direct Evidence for Dimerization of the HIV Restriction Factor APOBEC3G
Source: PubMed Central journal article supplement — J Biol Chem. 2010 Dec 1;286(5):3387–95. doi: 10.1074/jbc.M110.195685 (PMC3030345; doi:10.1074/jbc.m110.195685), 2010-12-01
Supplement: supp_M110.195685_jbc.M110.195685-1.pdf [file supp_M110.195685_jbc.M110.195685-1.pdf]

# Supplement

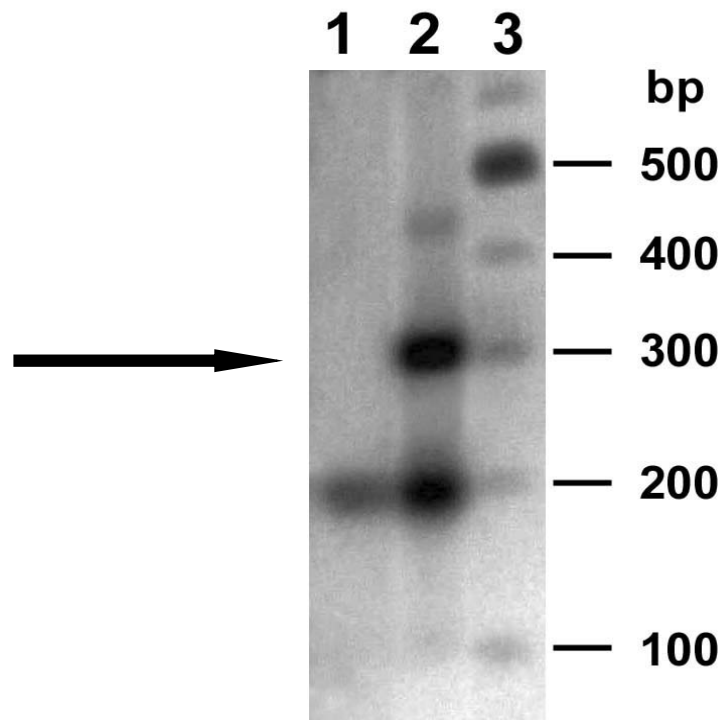

**Figure S1**

3% agarose gel presents:

Lane 1- 210bp dsDNA fragment,

Lane 2- 210bp dsDNA fragment ( fast migrating band) and ligated with 96-mer product ( slow migrated band), marked with the arrow,

Lane 3- ds DNA marker ( New England Biolab)

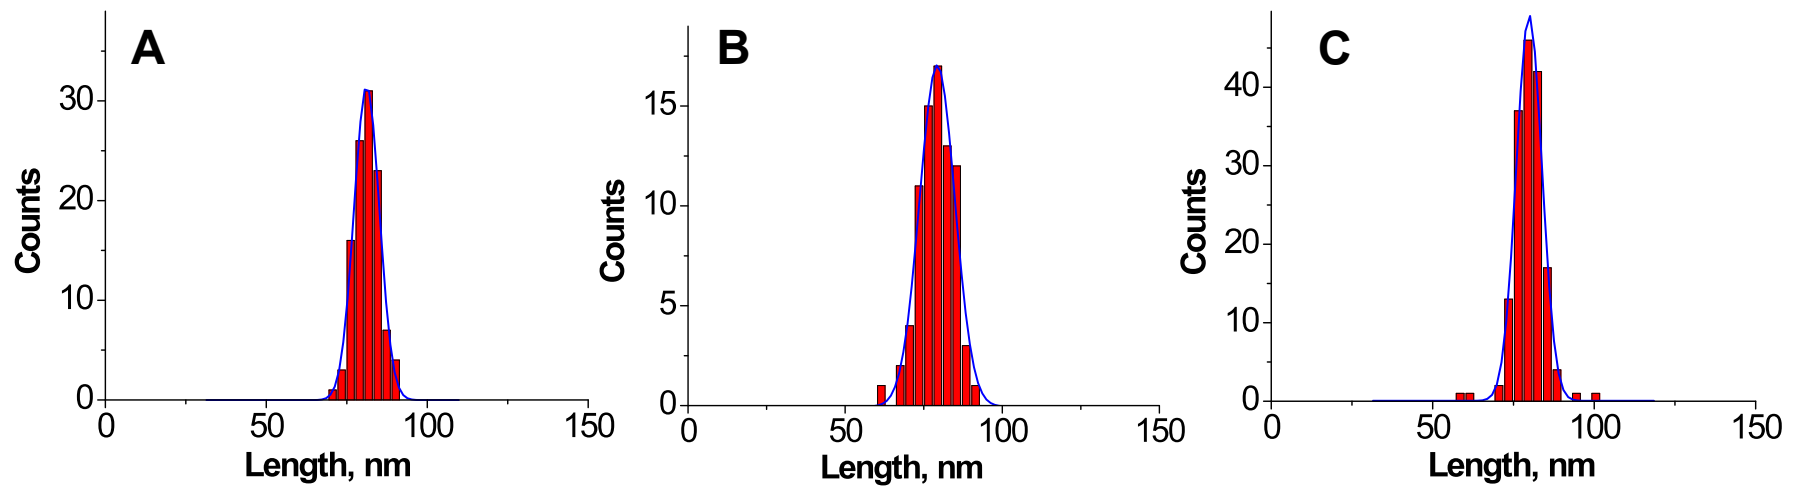

**Figure S2 A,B,C**

The distribution of contour lengths for DNA for samples prepared in the presence of 5mM  $Mg^{2+}$ . (A) The lengths of the double stranded regions of free DNA;  $81.2 \pm 3.9$  nm. (B) The lengths of double stranded DNA in the complex with A3G; the DNA length was measured from a free end to the middle of the blob on another end ;  $79.3 \pm 5.6$  nm. (C) The lengths of the DNA in the complex with A3G-H248 mutant protein measured similar as above;  $79.9 \pm 4.1$  nm.

A3G- wild type

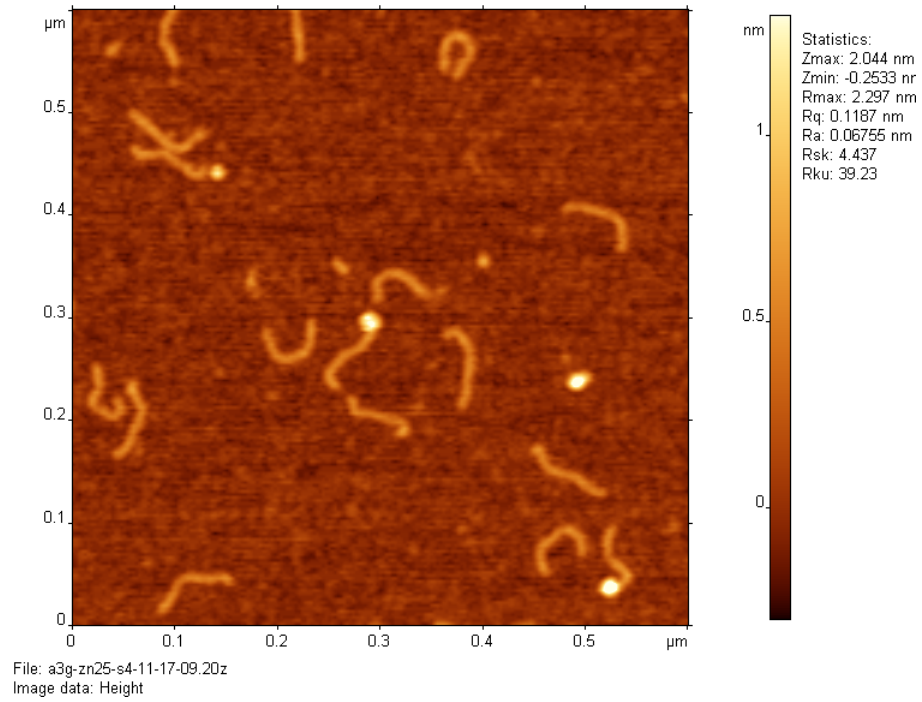

**Figure S3**

AFM image of A3G wild type protein and DNA complexes formed in the presence of  $25\mu\text{M Zn}^{2+}$ , image size 600nm.

Mutant

**A**

**B**

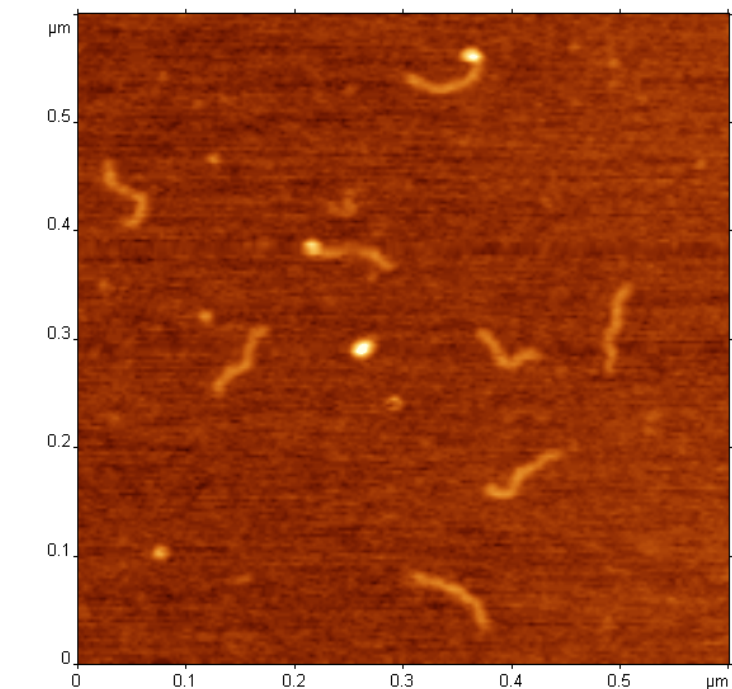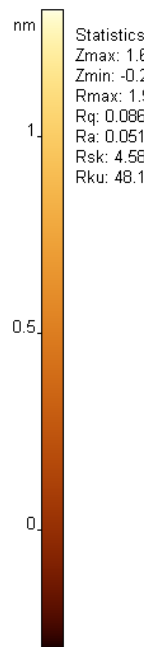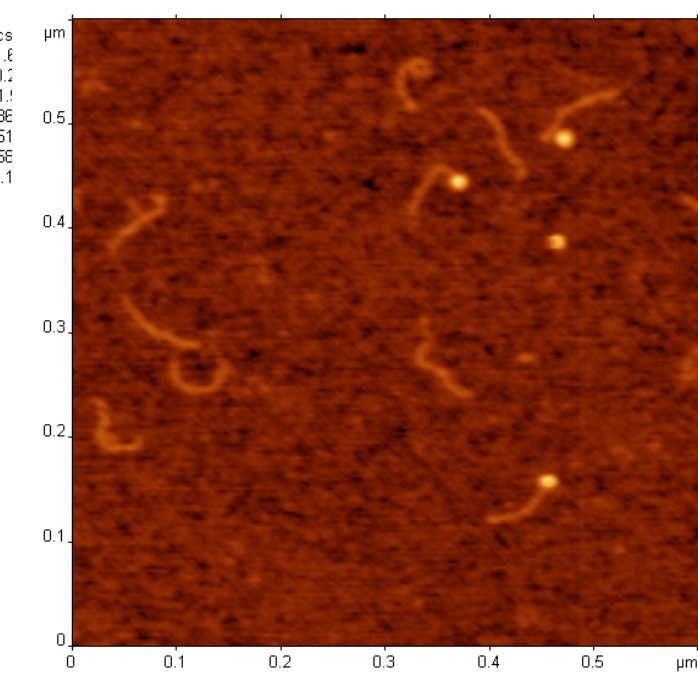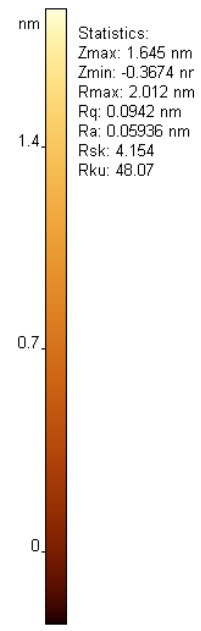

File: h24-zn25-s4-11-17-09.20z  
Image data: Height

File: h24-zn25-s4-11-17-09.66z  
Image data: Height

**Figure S4**

AFM images of A3G-H248 mutant protein and DNA complexes formed in the presence of 25 μM Zn<sup>2+</sup>, image size 600nm.

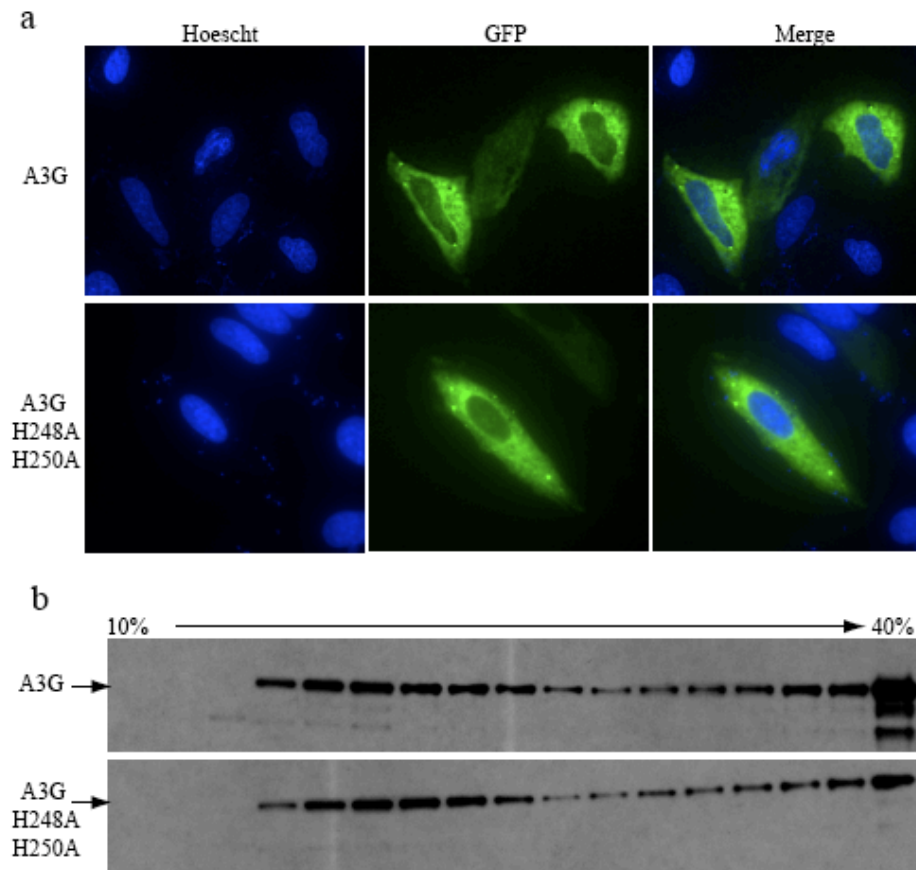

Figure S5. A3G and the mutant protein, A3G H248A/H250A, have similar localization and ultracentrifugation gradient profiles. (A) Localization of A3G and A3G H248A/H250A tagged with GFP. Nuclei are indicated in blue by Hoescht staining and proteins are fused with a GFP tag, displayed in green. (B) GFP-tagged proteins were expressed in HeLa cells, loaded and spun on 10-40% glycerol gradients, fractionated and analyzed by western blot for GFP. Relatively low molecular mass complexes (LMM) fractionate closer to the 10% glycerol concentration while high molecular mass complexes (HMM) migrate farther into the gradient.

Table S1.

*Independent t-test for A3G volume with Mg<sup>2+</sup> (A) and A3G volume without divalent cations (B):*

| Data | Mean      | Variance   | Number of events |
|------|-----------|------------|------------------|
| A    | 159.41974 | 7572.81128 | 106              |
| B    | 139.24257 | 3855.79613 | 106              |

---

t = -1.9432  
p = 0.05333

At the 0.05 level, the two means are NOT significantly different.

Table S2. *Independent t-test for A3G- volume with Zn<sup>2+</sup> (C ) and A3G volume with Mg<sup>2+</sup> (D):*

| Data | Mean      | Variance   | Number of events |
|------|-----------|------------|------------------|
| C    | 163.46501 | 9412.40136 | 72               |
| D    | 169.9122  | 9694.5733  | 72               |

---

t = 0.39577  
p = 0.69287

At the 0.05 level, the two means are NOT significantly different

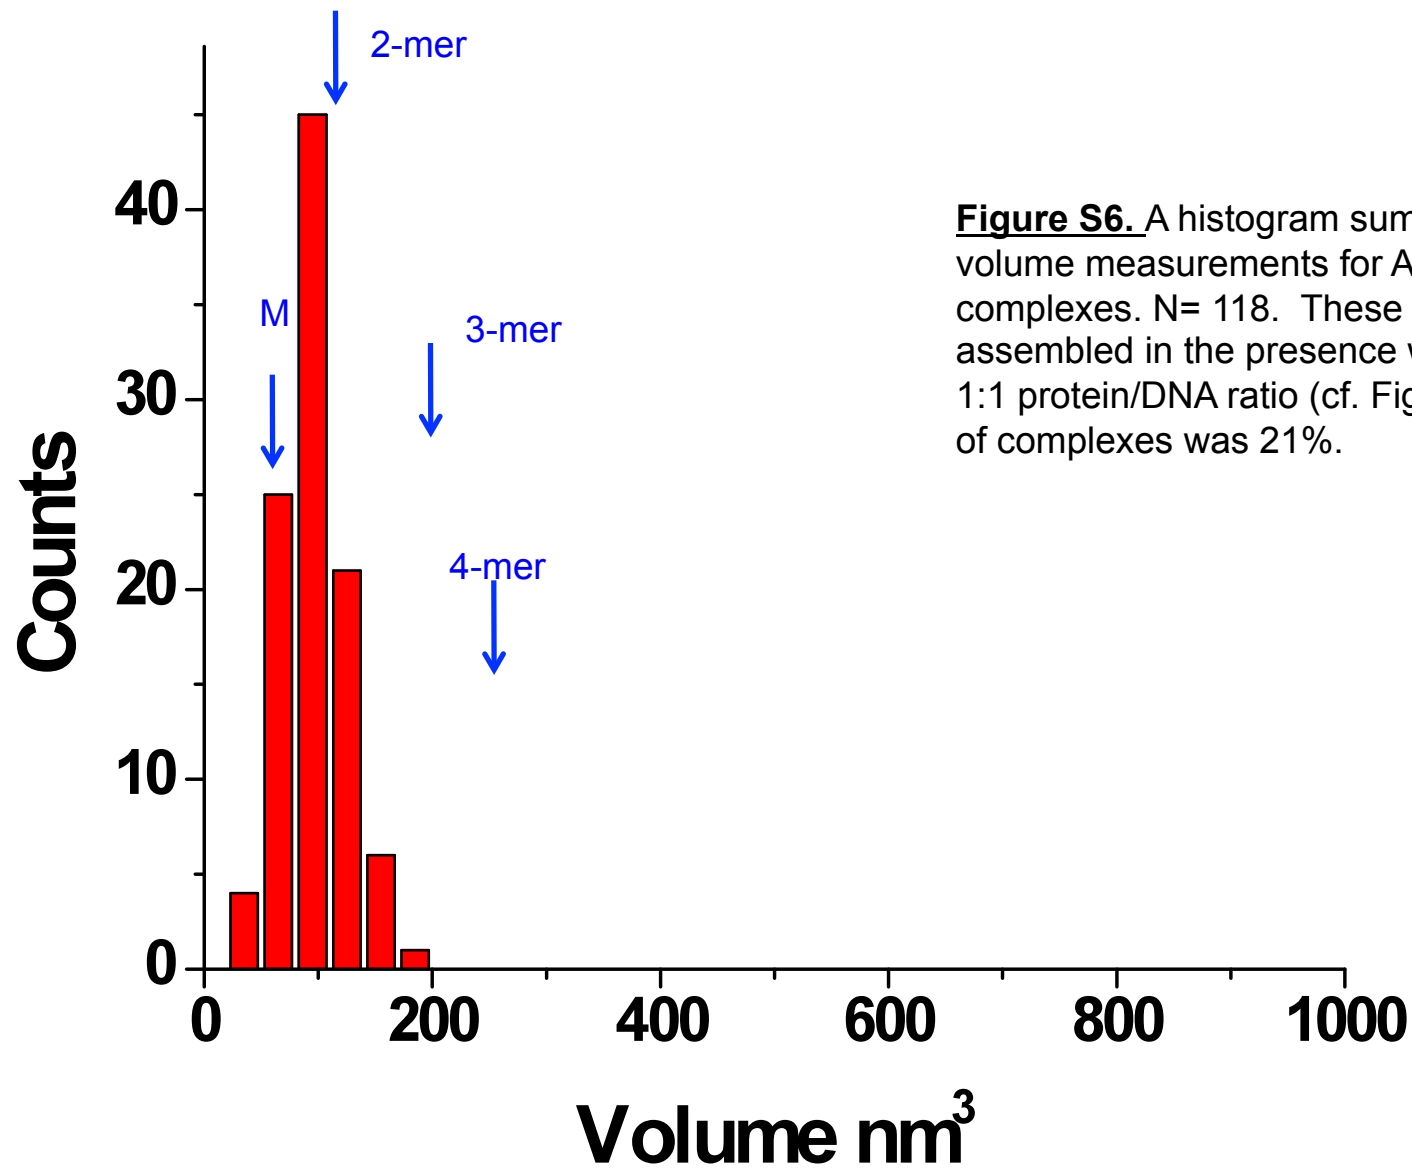

**Figure S6.** A histogram summarizing the volume measurements for A3G-ssDNA complexes. N= 118. These complexes were assembled in the presence with Mg<sup>2+</sup> using 1:1 protein/DNA ratio (cf. Fig. 3B). The yield of complexes was 21%.
